# Supplementary material for: Production of 3-hydroxypropionate using a novel malonyl-CoA-mediated biosynthetic pathway in genetically engineeredE. colistrain
Source: Royal Society of Chemistry journal article supplement (doi:10.1039/c9gc02286d), 2019-01-01
Supplement: c9gc02286d1.pdf [file c9gc02286d1.pdf]

**Table S1. All primers for gene amplification used in this study.**

| Primer           | Sequence(5'→3')                                               | Genes         |
|------------------|---------------------------------------------------------------|---------------|
| <i>RpmatB</i> -F | CGGGATCCGATGAACGCCAACCTGTTC                                   | <i>RpmatB</i> |
| <i>RpmatB</i> -R | CCCAAGCTTTTACTTGTAGATGTCCTTG                                  |               |
| <i>BjmatB</i> -F | CGGGATCCGATGAACCAAGCTGCCAAC                                   | <i>BjmatB</i> |
| <i>BjmatB</i> -R | CCCAAGCTTCTACTTCTTCGCGTAAATATC                                |               |
| <i>AtmatB</i> -F | CGGGATCCGATGACCGCTACGACAACATTAAG                              | <i>AtmatB</i> |
| <i>AtmatB</i> -R | CCCAAGCTTTTATTCTTGATTTTCCAGAG                                 |               |
| matC-F           | CGGGATCCATGGGCATTGAAATTTTAGC                                  | matC          |
| matC-R           | CCCAAGCTTTTACACTAAGCCCGGAAC                                   |               |
| mdcF-F           | CGGGATCCATGACCTATGTGATTATTC                                   | mdcF          |
| mdcF-R           | CCCAAGCTTCAGGCCGCTGGTTAAAG                                    |               |
| matPQM-F         | CGGGATCCATGAGCAGCTTTCGTCGC                                    | matPQM        |
| matPQM-R         | CCCAAGCTTCTGCACGGTACCCAGCATC                                  |               |
| dctPQM-F         | CGGGATCCATGCTGACCCGTCGTATTC                                   | dctPQM        |
| dctPQM-R         | CCCAAGCTTCATGCCCAGCAGATTCGGCAG                                |               |
| matC-F1          | CTCTAGAGTCGACCTGCAGATGCACCACCACCACCACG<br>GCATTGAAATTTTAGCAA  | matC          |
| matC-R1          | CCAAGCTTGCATGCCTGCAGTTACACTAAGCCCGGAACAA                      |               |
| mdcF-F1          | CTCTAGAGTCGACCTGCAGATGCACCACCACCACCACCA<br>CCTATGTGATTATTCATG | mdcF          |
| mdcF-R1          | CCAAGCTTGCATGCCTGCAGCAGGCCGCTGGTTAAAGAAA                      |               |
| matPQM-F1        | CTCTAGAGTCGACCTGCAGATGCACCACCACCACCACCA<br>GCAGCTTTCGTCGCAA   | matPQM        |
| matPQM-R1        | CCAAGCTTGCATGCCTGCAGCTGCACGGTACCCAGCATCT                      |               |
| dctPQM-F1        | CTCTAGAGTCGACCTGCAGATGCACCACCACCACCACC<br>TGACCCGTCGTATTCTGG  | dctPQM        |
| dctPQM-R1        | CCAAGCTTGCATGCCTGCAGCAAAAACCCCTCAAGACC                        |               |
| matC-R2          | ACGCGTCGACTTACACTAAGCCCGGAAC                                  | matC          |
| mdcF-R2          | ACGCGTCGACCAGGCCGCTGGTTAAAG                                   | mdcF          |
| matPQM-R2        | ACGCGTCGACCTGCACGGTACCCAGCATC                                 | matPQM        |
| dctPQM-R2        | ACGCGTCGACCATGCCCAGCAGATTCGGCAG                               | dctPQM        |
| mcr-F1           | GGAAGATCTCATGAGCGGAACAGGACGACT                                | mcr           |

|           |                                                    |        |
|-----------|----------------------------------------------------|--------|
| mer-R1    | CCGCTCGAGTTACACGGTAATCGCCCGTCC                     |        |
| RpmatB-F1 | CATCACCACAGCCAGGATCCGATGAACGCCAACCTGTTTCGC<br>C    | RpmatB |
| RpmatB-R1 | CCGAGCTCGAATTCGGATCCTTACTTGTAGATGTCCTTGT           |        |
| mer-F2    | CGCGGATCCGATGAGCGGAACAGGACGACT                     | mer    |
| mer-R2    | ACGCGTCTGACTTACACGGTAATCGCCCGTCC                   |        |
| RpmatB-F2 | GATATACATATGGCAGATCTCATGAACGCCAACCTGTTTCGC<br>C    | RpmatB |
| RpmatB-R2 | CCGATATCCAATTGAGATCTTTACTTGTAGATGTCCTTGT           |        |
| pntAB-F   | GCCTGCAGGTCGACAAGCTTTAATACGACTCACTATAGGG           | pntAB  |
| pntAB-R   | CATTATGCGGCCGCAAGCTTCAAAAAACCCCTCAAGACCC           |        |
| yfjB-F    | TGTTGCAGTCAACTCTGCAGTTGCTCACATCTCACTTTAA           | yfjB   |
| yfjB-R    | CGAGAAACAGCGTACCCTGCAGTTAGAATAATTTTTTTGAC<br>CAGCC |        |

**Table S2. Strains and plasmids used in this study.**

| Name                      | Description                                                                             | Reference  |
|---------------------------|-----------------------------------------------------------------------------------------|------------|
| <b>Strains</b>            |                                                                                         |            |
| <i>E. coli</i> BL21 (DE3) | <i>F<sup>-</sup> ompT gal dcm lon hsdSB</i> (rB <sup>-</sup> mB <sup>-</sup> ) λ(DE3)   | Invitrogen |
| <i>E. coli</i> C43 (DE3)  | <i>F<sup>-</sup> ompT hsdSB</i> (rB <sup>-</sup> mB <sup>-</sup> ) <i>gal dcm</i> (DE3) | Invitrogen |
| SGN01                     | <i>E. coli</i> BL21 (DE3)/pSGN-01                                                       | This study |
| SGN15                     | <i>E. coli</i> BL21 (DE3)/pSGN15                                                        | This study |
| SGN16                     | <i>E. coli</i> BL21 (DE3)/pSGN16                                                        | This study |
| SGN10                     | <i>E. coli</i> C43 (DE3)/pSGN10                                                         | This study |
| SGN18                     | <i>E. coli</i> C43 (DE3)/pSGN18                                                         | This study |
| SGN20                     | <i>E. coli</i> C43 (DE3)/pSGN20                                                         | This study |
| SGN21                     | <i>E. coli</i> C43 (DE3)/pSGN21                                                         | This study |
| SGN22                     | <i>E. coli</i> C43 (DE3)/pSGN22                                                         | This study |
| SGN25                     | <i>E. coli</i> C43 (DE3)/pSGN25                                                         | This study |
| SGN27                     | <i>E. coli</i> C43 (DE3)/pSGN27                                                         | This study |
| SGN28                     | <i>E. coli</i> C43 (DE3)/pSGN28                                                         | This study |

|       |                                               |            |
|-------|-----------------------------------------------|------------|
| SGN69 | <i>E. coli</i> C43 (DE3)/pSGN69               | This study |
| SGN70 | <i>E. coli</i> C43 (DE3)/pSGN70               | This study |
| SGN68 | <i>E. coli</i> C43 (DE3)/pSGN68               | This study |
| SGN72 | <i>E. coli</i> C43 (DE3)/pSGN72               | This study |
| SGN34 | <i>E. coli</i> C43 (DE3)::yjfB                | This study |
| SGN47 | <i>E. coli</i> C43 (DE3)/pSGN36               | This study |
| SGN73 | <i>E. coli</i> C43 (DE3)/pSGN68;pSGN-36       | This study |
| SGN74 | <i>coli</i> C43 (DE3)/pSGN68;pSGN-41          | This study |
| SGN75 | <i>E. coli</i> C43 (DE3)/pSGN68;pSGN-40       | This study |
| SGN78 | <i>E. coli</i> C43 (DE3)::yjfB/pSGN68;pSGN-42 | This study |

### plasmids

|             |                                                                                                        |            |
|-------------|--------------------------------------------------------------------------------------------------------|------------|
| pET28a      | lacI; expression vector; T7 promoter; Kan <sup>r</sup>                                                 | Novagen    |
| pBAD-24     | expression vector; arabinose Bad promoter; Amp <sup>r</sup>                                            | Novagen    |
| pMAL-c2x    | expression vector; tac promoter; Amp <sup>r</sup>                                                      | Novagen    |
| pRSFDuet-1  | lacI; expression vector; T7 promoter; two sets of MCS; MCS I, His6-N; MCS II,S-tag-N; Kan <sup>r</sup> | Novagen    |
| pACYCDuet-1 | lacI; expression vector; T7 promoter; two sets of MCS; MCS I, His6-N; MCS II,S-tag-N; Cm <sup>r</sup>  | Novagen    |
| pSGN-01     | pACYCDuet-1 carrying <i>RpmatB</i> from <i>R. palustris</i> ; Cm <sup>r</sup>                          | This study |
| pSGN-15     | pACYCDuet-1 carrying <i>BjmatB</i> from <i>B. japonicum</i> ; Cm <sup>r</sup>                          | This study |
| pSGN-16     | pACYCDuet-1 carrying <i>AtmatB</i> from <i>A. thaliana</i> ; Cm <sup>r</sup>                           | This study |
| pSGN-10     | pET28a carrying <i>matC</i> from <i>R. leguminosarium bv trifolii</i> ; Kan <sup>r</sup>               | This study |
| pSGN-18     | pET28a carrying <i>mdcF</i> from <i>K. pneumoniae</i> ; Kan <sup>r</sup>                               | This study |
| pSGN-20     | pET28a carrying <i>matPQM</i> from <i>S. meliloti</i> ; Kan <sup>r</sup>                               | This study |
| pSGN-21     | pET28a carrying <i>dctPQM</i> from <i>R. capsulatus</i> ; Kan <sup>r</sup>                             | This study |
| pSGN-22     | pMAL-c2x carrying <i>matC</i> from <i>R. leguminosarium bv trifolii</i> ; Amp <sup>r</sup>             | This study |
| pSGN-25     | pMAL-c2x carrying <i>mdcF</i> from <i>K. pneumoniae</i> ; Amp <sup>r</sup>                             | This study |
| pSGN-27     | pMAL-c2x carrying <i>matPQM</i> from <i>S. meliloti</i> ; Amp <sup>r</sup>                             | This study |
| pSGN-28     | pMAL-c2x carrying <i>dctPQM</i> from <i>R. capsulatus</i> ; Amp <sup>r</sup>                           | This study |
| pSGN-69     | pBAD-24 carrying <i>matC</i> from <i>R. leguminosarium bv trifolii</i> ; Amp <sup>r</sup>              | This study |
| pSGN-70     | pBAD-24 carrying <i>mdcF</i> from <i>K. pneumoniae</i> ; Amp <sup>r</sup>                              | This study |

|         |                                                                                                                                                                      |            |
|---------|----------------------------------------------------------------------------------------------------------------------------------------------------------------------|------------|
| pSGN-68 | pBAD-24 carrying <i>matPQM</i> from <i>S. meliloti</i> ; Amp <sup>r</sup>                                                                                            | This study |
| pSGN-72 | pBAD-24 carrying <i>dctPQM</i> from <i>R. capsulatus</i> ; Amp <sup>r</sup>                                                                                          | This study |
| pSGN-35 | pRSFDuet-1 carrying <i>mcr</i> (linker) from <i>C. aurantiacus</i> ; Kan <sup>r</sup>                                                                                | This study |
| pSGN-36 | pRSFDuet-1 carrying <i>mcr</i> (linker; MCSI) from <i>C. aurantiacus</i> ; <i>RpmatB</i> (MCSII) from <i>R. palustris</i>                                            | This study |
| pSGN-40 | pRSFDuet-1 carrying <i>RpmatB</i> (MCSI) from <i>R. palustris</i> ; <i>mcr</i> (MCSII) from <i>C. aurantiacus</i>                                                    | This study |
| pSGN-41 | pRSFDuet-1 carrying <i>RpmatB</i> (MCSI) from <i>R. palustris</i> ; <i>mcr</i> (linker; MCSII) from <i>C. aurantiacus</i>                                            | This study |
| pSGN-42 | pRSFDuet-1 carrying <i>RpmatB</i> (MCSI) from <i>R. palustris</i> and PntAB from <i>E. coli</i> DH5 $\alpha$ ; <i>mcr</i> (linker; MCSII) from <i>C. aurantiacus</i> | This study |

**Table S3. All primers used in transcription analysis of transporter genes**

| Primer   | Sequence (5'→3')        |
|----------|-------------------------|
| matC-F   | TGTGCTGGGTAGTATGACCA    |
| matC-R   | TGCAAACAGATAGGTCACG     |
| mdcF-F   | ATTGTTGCCAGTCTCCGTT     |
| mdcF-R   | ACGGTTAAGGTCAGAAGTCTGCT |
| matPQM-F | GATCAGTGGAATGCAGTGAC    |
| matPQM-R | TGGTATACAGATCACTAC      |
| dctPQM-F | GAAGAAGTGGGAAGCACTGCAG  |
| dctPQM-R | ATCCGAATAGCCAGCTGTAT    |

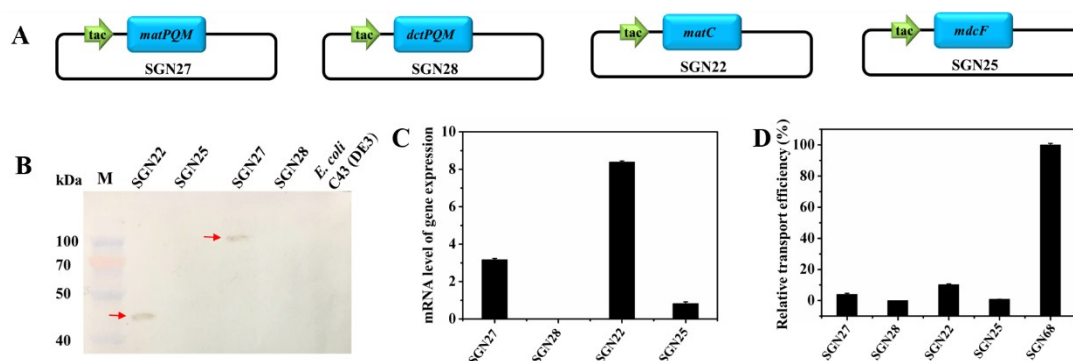

**Fig.S1 Identification of malonate transporters expression and function under tac promoter**

in *E. coli*. (A) Construction of recombinant strains carrying malonate transport genes. (B) Western Blot analysis of expressed malonate transport proteins. (C) Transcription analysis of transporter genes. (D) Relative malonate transport efficiency of tested transporters.

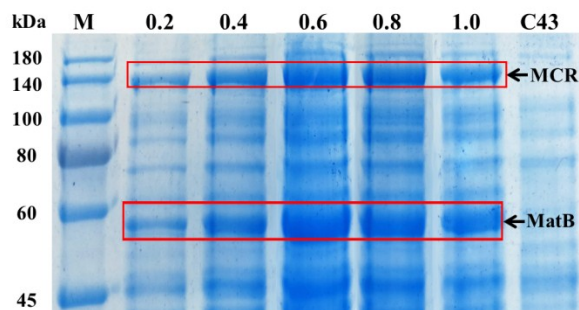

**Fig.S2 SDS-PAGE analysis of the expression levels of the enzymes by varying the concentration of the inducer IPTG.**

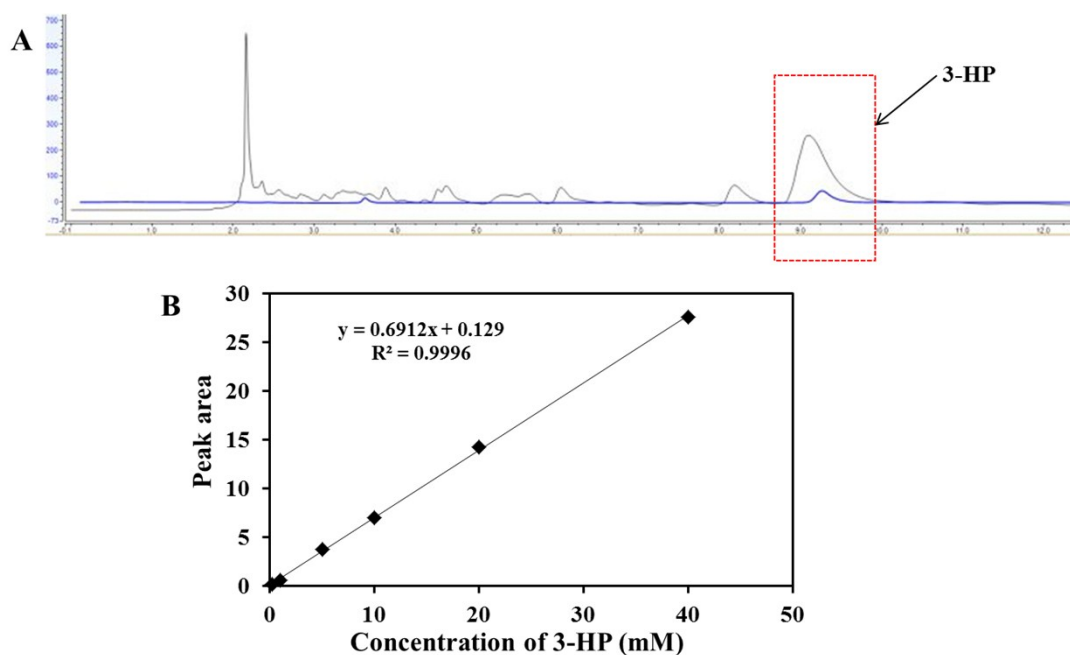

**Fig.S3 The HPLC chromatogram and calibration curve of 3-HP.** (A) The HPLC chromatogram of 3-HP Standards (blue line) and engineered strain constructed in this study (black line). The retention time of 3-HP was 9.15 min. (B) The calibration curve of 3-HP.

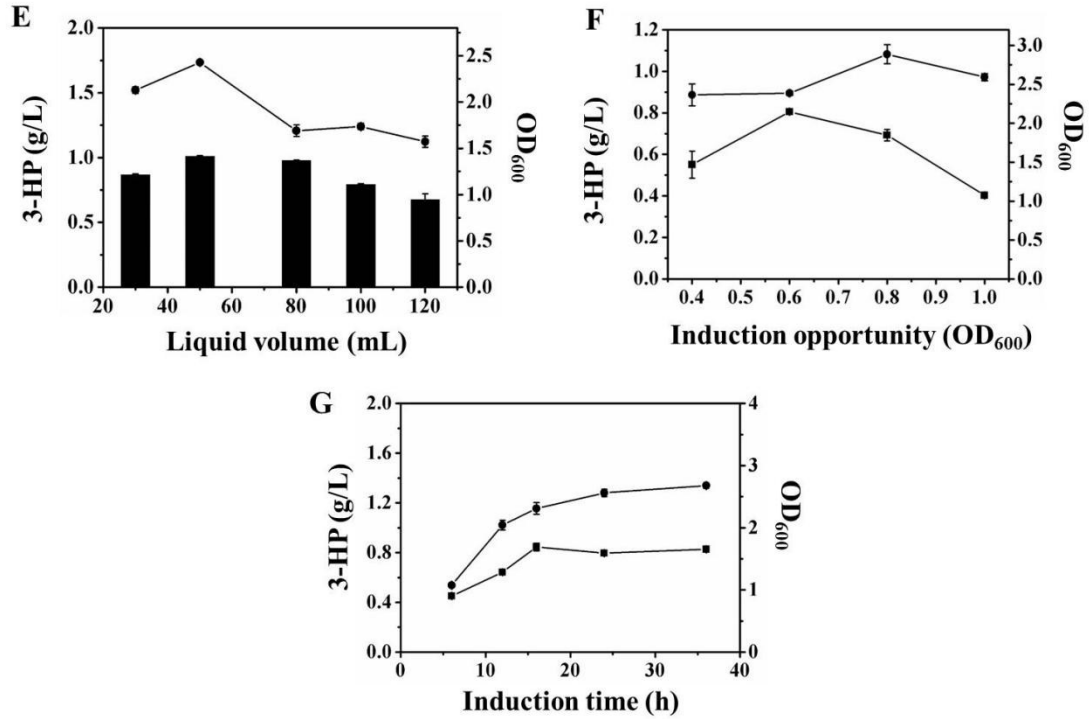

**Fig.S4 Effects of fermentation conditions on 3-HP production by SGN74.** (E): Effect of volume of fermentation medium on 3-HP production; (F): Effect of induction opportunity on 3-HP production; (G): Effect of induction time on 3-HP production. All the experiments were performed in triplicates. Black line of filled circle, OD<sub>600</sub> value of strain SGN74. Black columns and black line of filled square, 3-HP production under different fermentation conditions.
